# Supplementary material
Source: PubMed Central journal article supplement (PMC4787260)
Supplement: NIHMS762705-supplement-Supplementary_Materials.pdf [file NIHMS762705-supplement-Supplementary_Materials.pdf]

## Supplementary Material for

### **Gut bacteria that prevent growth impairments transmitted by microbiota from malnourished children**

Laura V. Blanton, Mark R. Charbonneau, Tarek Salih, Michael J. Barratt, Siddarth Venkatesh, Olga Ilkaveya, Sathish Subramanian, Mark J. Manary, Indi Trehan, Josh M. Jorgensen, Yuemei Fan, Bernard Henrissat, Semen A. Leyn, Dmitry A. Rodionov, Andrei L. Osterman, Kenneth M. Maleta, Christopher B. Newgard, Per Ashorn, Kathryn G. Dewey, and Jeffrey I. Gordon\*

\*Correspondence to: [jgordon@wustl.edu](mailto:jgordon@wustl.edu)

#### **This PDF file includes:**

Materials and Methods  
Supplementary Text  
Figs. S1 to S10  
Captions for Tables S1 to S17

## **Materials and Methods**

### Human studies

Details of the 317 infant twin pairs and three sets of triplets enrolled in the Malawi Twin Cohort study from birth to 32 months of age are described in an earlier publication (13). Enrollment for the iLiNS-DYAD-M study [clinicaltrials.gov #NCT01239693] was open to consenting women over the age of 15 years, with ultrasound confirmation of a pregnancy that was <20 weeks, who had come for prenatal care at one of three study clinics located in Mangochi District of southern Malawi (one public district hospital in Mangochi, one rural semi-private hospital in Malindi, and one rural public health center in Lungwena). This randomized, controlled clinical trial tested the effects of providing Small Quantity Lipid-based Nutrient Supplements (SQ-LNS) to pregnant and lactating women through 6 months postpartum and to their infants from 6-18 months of age (16).

### Bacterial 16S rRNA sequencing

DNA was extracted by suspending pulverized human fecal samples (~50mg), or in the case of mouse studies resuspending fecal pellets, in a solution containing 500µL of extraction buffer [200 mM Tris (pH 8.0), 200 mM NaCl, 20 mM EDTA], 210µL of 20% SDS, 500µL phenol:chloroform:isoamyl alcohol (pH 7.9, 25:24:1, Ambion), and 500µL of 0.1-mm diameter zirconia/silica beads. Cells were mechanically disrupted using a bead beater (BioSpec Products, Bartlesville, OK; maximum setting for 4 minutes at room temperature), followed by extraction with phenol:chloroform:isoamyl alcohol and precipitation with isopropanol.

PCR was used to generate amplicons (~365bp) of variable region 4 (V4) of the bacterial 16S rRNA gene using primers and cycling conditions described in a previous report (11). PCR primers incorporated sample-specific barcodes allowing samples to be subjected to multiplex sequencing using the Illumina MiSeq instrument (paired-end 250nt reads). Paired V4-16S rRNA sequences were trimmed to 200bp and merged into a single sequence with Flash software (24). Merged sequences were filtered for low quality reads and binned according to their sample-specific barcodes. Reads were clustered into 97%ID OTUs using UCLUST (14) and the Greengenes OTU reference database (version May 2013). Reads that failed to hit the reference dataset were clustered *de novo* using UCLUST. A representative OTU set was created using the most abundant OTU from each bin. Reads were aligned using PyNAST. A custom dataset of manually modified NCBI bacterial taxonomy (18) was used to train the Ribosomal Database Project (RDP) version 2.4 classifier (15) and to assign taxonomy to picked OTUs. Validation of this assignment strategy is described in a previous publication (18). For analysis of bacterial abundance and colonization efficiency, rare OTUs (<0.1% relative abundance within each sample) were removed.

### Random Forests-derived models and statistical analysis

Models were generated using the randomForests package in R. 1000 trees were generated per iteration, and 100 iterations were performed to generate average MSE values. The rfcv function was utilized for cross-validation.

Univariate analyses (t-tests and ANOVA) were performed using Microsoft Excel or Prism 6.0 (GraphPad Software, Inc.). Heatmaps were generated using Gene-E software (<http://www.broadinstitute.org/cancer/software/GENE-E/index.html>). Spearman's rank correlation analyses were performed in the R environment using the ltm package and rcor.test function.

### Gnotobiotic mouse studies

All gnotobiotic mouse experiments were performed using protocols approved by the Washington University Animal Studies Committee. Male germ-free C57BL/6J mice were maintained in sterile, flexible, plastic gnotobiotic isolators (Class Biologically Clean Ltd., Madison, WI) under a strict 12-hour cycle (lights on at 0600h, off at 1800h). Mice were fed an autoclaved low-fat, polysaccharide-rich chow (LF/HPP) diet (B&K University, East Yorkshire, U.K.; diet 7378000) from weaning until 3 days prior to the beginning of an experiment. At that time, 4.5-week-old male mice were switched to the M8 diet for the remainder of the experiment. All animals were euthanized without prior fasting.

*Preparation of the Malawi-8 (M8) Diet* –The macro- and micronutrient content of components of this prototypic Malawian diet was computed using the USDA Nutrient Database. Linear programming was then employed to calculate combinations of ingredients that resembled the mean energy and nutrient values for foods identified from the diet survey.

The M8 diet was prepared as follows. Maseca® corn flour was obtained from Restaurant Depot (College Point, NY). The remaining ingredients were purchased from Whole Foods Supermarkets. A relish containing 2kg mustard greens, 1.5kg onions, and 1.5kg tomatoes was first prepared by pureeing them in a food processor (Robot Coupe Model R23, Jackson, MS) and cooking the puree in 1L water for 60 minutes on a Corning stirrer/hot plot (high setting, until browned). After cooking, the relish was combined with a pureed mixture of 1kg ground peanuts, 700g soaked red kidney beans, 1kg canned pumpkin, and 2.5kg peeled bananas in an industrial mixer (Globe SP30P 30-quart pizza mixer; gear speed 1; Globe Food Equipment Company, Dayton, OH). Corn flour (5kg) and hot, freshly autoclaved water (5L) were then added slowly and mixed using the industrial mixer for 5 minutes to ensure uniformity of the food. Dry pellets of the M8 diet were then generated (extruded diameter, 0.5-inch) (Dyets, Inc. Bethlehem, PA), placed in FDA/USDA-compliant poly-nylon vacuum pouches (#S-7556; Uline, Pleasant Prairie, WI; 500 g aliquots), double-bagged and sterilized by irradiation (20-50 kGy) within 24 hours of production (Steris Co; Chicago, IL). The nutritional content of all cooked and irradiated custom diets was defined by N.P. Analytical Laboratories (St Louis, MO) (**Table S5**). Irradiated food was stored at 4°C for up to six months. Sterility was determined by resuspending a small aliquot of each batch of food in pre-reduced Gut Microbiota Medium (GMM; (25)) under anaerobic conditions and incubating the suspension for 3 days at 37°C. Sterility was further verified by subculture on pre-reduced anaerobic GMM agar plates.

*Generation of clarified stool for gavage into gnotobiotic mice* – An aliquot of the frozen sample was pulverized in a Biosafety Class II hood with a ceramic mortar and pestle filled with liquid nitrogen. An aliquot (1g) of the pulverized material, sealed in a sterile screw-capped tube (Axygen SCT-200-C-S), was brought into an anaerobic Coy

chamber (atmosphere: 20% CO<sub>2</sub>, 5% H<sub>2</sub>, and 75% N<sub>2</sub>), immediately suspended in 15mL GMM and vortexed on maximum speed (four cycles of blending for 20 seconds followed by a 30 second pause). The sample was allowed to stand for 5 minutes so that particulate matter could settle by gravity; the resulting supernatant was passed through a 100µm pore diameter filter (BD systems, Inc. Franklin Lakes, NJ) to remove remaining particulate material, mixed with an equal volume of pre-reduced GMM containing 30% glycerol (final concentration 15% glycerol) and placed in Wheaton crimp top tubes for storage at -80°C. Mice received a single oral gavage (200µL) of a clarified uncultured human fecal sample 3 days after switching to the M8 diet.

*Quantitative magnetic resonance (qMR) analysis of body composition* – Body composition was defined using an EchoMRI-3in1 instrument (EchoMRI, Houston, TX). Each mouse was transported from a gnotobiotic isolator to the MR instrument in a 9.5” long, 2” diameter, HEPA filter-capped glass vessel. At each time point surveyed, each mouse was scanned 2-3 times in the instrument over a 5 minute period and the values from each scan were averaged.

*Sample collection* – Fecal samples were collected at defined times after gavage. At sacrifice, cecal contents, liver, brain, and skeletal muscle (gastrocnemius) were collected and immediately frozen in liquid nitrogen. Gastrocnemius muscle was freeze-clamped immediately after sacrifice using pre-chilled forceps.

*Defining the efficiency of microbiota transplantation* – Transplantation efficiency was assessed by comparing 97%ID OTUs represented in the input human donor sample, weighted to relative abundance, and in the fecal microbiota of recipient mice sampled throughout the course of the experiment [**Table S4B**; note that microbiota from four 6-month-old singleton infants from iLiNS-DYAD-M (two healthy, two undernourished) and four 18-month-old co-twins from the Malawian twin study (one healthy, three undernourished) had >50% transplantation efficiency]. Bacterial viability, quantified by the number of colony forming units 24 hours after plating onto GMM medium, was significantly greater ( $p < 3.2 \times 10^{-6}$ ; Student's t-test) in the case of fecal samples from the twins, which had been flash frozen in liquid nitrogen within 5-10 minutes after they were produced. In iLiNS-DYAD-M, the time to freezing was often several hours.

*Micro-computed tomography (micro-CT)* – Femurs were harvested from mice at time of sacrifice, cleaned of soft tissue and stored at 4°C in 70% ethanol solution until scanned. Micro-CT was performed using a µCT 40 desktop, cone-beam instrument (ScanCO Medical, Brüttisellen, Switzerland). For cortical analyses, 200-300 slices were taken of each femur in the transverse plane with a 6µm voxel size (high resolution). For all cortical scans, slices began at the midpoint of the femur and extended toward the distal femur. Boundaries of and thresholds for bone were drawn manually using the µCT 40 software, and volumetric parameters (bone volume/tissue volume, bone mineral density, and cortical thickness) were calculated using custom scripts.

*Cohousing experiments* – Four days after gavage of donor microbiota, all mice were placed into HEPA filter-capped glass transport tubes for qMR measurements. Following qMR, control mice were returned to their original gnotobiotic isolator and housed with a cagemate of similar body weight colonized with the same donor microbiota (H-H controls; Un-Un controls). For pairing of Un<sup>CH</sup> and H<sup>CH</sup> mice, animals were transported to a new gnotobiotic isolator. All mice received fresh autoclaved

bedding (Aspen wood shavings, NEPCO) upon initiation of cohousing. Bedding was changed weekly in all cages in each gnotobiotic isolator.

We defined the direction of invasion by calculating the log odds ratio of the probability of a H origin ( $PH$ ) or an Un origin ( $PU_n$ ) for each species-level taxon or 97%ID OTU,  $i$ :

$$\log_2 [PH_i / PU_n]$$

A positive log odds ratio indicates that a species or 97%ID OTU is derived from a H source, while a negative log odds ratio indicates a Un source. An invasion score was calculated to quantify the success of invasion of each species or 97%ID OTU,  $i$ , into each cohousing group,  $j$ :

$$Invasion\ Score_{ij} = \log_2 [\overline{A}_{ij} / \overline{B}_{ij}]$$

where  $\overline{A}_{ij}$  is the average relative abundance of taxon  $i$  in all fecal samples collected from group  $j$  after cohousing, and  $\overline{B}_{ij}$  is its relative abundance in all samples from that group prior to initiation of cohousing. The mean of the distribution of invasion scores for Un<sup>CH</sup> animals was significantly higher than that for Un-Un controls ( $P \leq 0.0085$ , Welch's two-sample t-test). This was not the case for H<sup>CH</sup> animals compared to H-H controls ( $P > 0.05$ ).

#### Targeted mass spectrometry

Liver, brain, and muscle tissue samples were homogenized in 50% aqueous acetonitrile containing 0.3% formic acid (50mg wet weight tissue/mL solution) using a high-speed homogenizer (IKA Model #EW-04739-21) set at maximum speed for 30-45 seconds. Samples were maintained on ice or dry ice throughout homogenization.

Amino acids, acylcarnitines, organic acids, acyl CoAs and ceramides were analyzed using stable isotope dilution techniques. Amino acids and acylcarnitine measurements were made by flow injection tandem mass spectrometry using sample preparation methods described previously (26, 27). Data were acquired using a Waters Acquity<sup>TM</sup> UPLC system equipped with a TQ (triple quadrupole) detector and a data system controlled by MassLynx 4.1 operating system (Waters, Milford, MA). Organic acids were quantified according to a previously published protocol (28) using Trace Ultra GC coupled to ISQ MS operating under Xcalibur 2.2 (Thermo Fisher Scientific, Austin, TX). Acyl CoAs were extracted and purified (29-31), and analyzed by flow injection analysis using positive electrospray ionization on a Xevo TQ-S triple quadrupole mass spectrometer (Waters, Milford, MA). Heptadecanoyl CoA was employed as an internal standard. Ceramides were extracted (32) and analyzed by flow injection tandem mass spectrometry using a Xevo TQS spectrometer (Waters Milford, MA) for precursors of  $m/z$  264.

#### Culturing and characterization of age- and/or growth- discriminatory bacterial strains from the microbiota of healthy Malawian children

*Culturing* – Fecal samples were resuspended in 10ml of GMM under anaerobic conditions, diluted 1:1000, and then plated onto GMM and incubated at 37°C under anaerobic conditions overnight. Isolated colonies were picked into single wells of a deep 96-well plate, with 600µl liquid GMM per well, and grown anaerobically at 37°C overnight. Cultures were then mixed with an equal volume of pre-reduced GMM containing 30% glycerol (final concentration 15% glycerol) for storage at -80°C. To assign taxonomy, DNA was extracted from each well and V4-16S rRNA gene amplicons were generated and sequenced.

Taxonomies were confirmed by sequencing full-length 16S rRNA amplicons produced using primers 8F and 1391R.

*Genome sequencing of two strains obtained from the healthy infant Malawian donor 8243C* – DNA libraries for sequencing *R. gnavus* TS8243C and *C. symbiosum* TS8243C on Illumina MiSeq were prepared using a multistep protocol of end-repair, A-tailing, and ligation to customized sample-specific barcoded Illumina adapters. The resulting adapter-ligated DNA was size-selected (250-350bp) using agarose gel electrophoresis and then used as a template for enrichment PCR (cycling conditions: 98°C for 30 sec, followed by 18 cycles of 98°C for 10 sec, 65°C for 30 sec, 72°C for 45 sec, and then 72°C for 5 minutes). Multiplex sequencing was performed (paired-end 250nt reads). Genomes were assembled with the mira software package (33). For *R. gnavus* TS8243C, N50 contig length was 2,263,429bp with an aggregate genome size of 3.7Mbp. For *C. symbiosum* TS8243C, N50 contig length was 328,298bp with a 5.3Mbp genome size. Annotation was initially performed using PROKKA (34).

*Genome-based reconstruction of selected metabolic subsystems in R. gnavus and C. symbiosum strains* – Reconstruction of selected metabolic pathways (also termed as subsystems) was based on functional gene annotation and prediction using two comparative genomics techniques: (i) homology-based methods and (ii) genome context analysis. First, predicted proteomes were scanned against the KEGG Orthology, Pfam, CAZY, TCDB, Uniprot and SEED databases to identify proteins potentially involved in the carbohydrate utilization, amino acid metabolism and vitamin and cofactor biosynthesis and salvage pathways. The genomic and functional contexts of loci encoding the proteins were then analyzed and the respective metabolic pathways and transcriptional regulons were reconstructed. Additional closely related bacterial genomes available in the Integrated Microbial Genomes (35) and SEED databases (36) were used for comparative genomics-enabled pathway and regulon inference. Transcriptional regulons (sets of genes co-regulated via shared transcription factors (TFs) and transcription factor binding sites (TFBS) or shared RNA elements, riboswitches, responding to respective pathway metabolites) were predicted and reconstructed using the comparative genomics approach (37) implemented in the RegPrecise database (38). This integrative subsystems-based approach was used previously for reconstruction of carbohydrate utilization pathways and regulons in members of *Shewanella*, *Thermotoga*, and *Bacteroides* lineages (39-41).

## **Supplementary Text**

### Effects of gut microbiota immaturity on host metabolism

As noted in the main text, we cross-referenced the results of metabolic profiling conducted in mice treated with *R. gnavus* and *C. symbiosum* and untreated controls, with those obtained from mice harboring the same undernourished donor's microbiota and the healthy donor's microbiota used in the cohousing experiments. For the latter experiments, serum, liver, gastrocnemius muscle, and brain were obtained at the time of euthanasia three weeks after gavage of these microbial communities, and analyzed by targeted mass spectrometry ( $N = 5-6$  mice/treatment group). The two donors' microbiota conferred distinct metabolic phenotypes with the major differences involving fatty acid and amino acid metabolism; mice colonized with the healthy donor's microbiota had significantly higher concentrations of long chain acylcarnitines in their serum and liver

and significantly decreased concentrations of a number of amino acids in their gastrocnemius muscle (and cecal contents) ( $P < 0.05$ ; Student's t-test; **Fig. S7, Table S16**). These data support the notion that mice colonized with the healthy donor microbiota funnel amino acids into new protein synthesis and lean body mass, whereas those colonized with the undernourished donor microbiota preserve the amino acid pools for oxidation and energy production. Consistent with this idea, increased levels of the branched-chain amino acids Val and Leu/Ile in the gastrocnemius muscle of mice colonized with undernourished donor microbiota were accompanied by an increase in a metabolite produced by their oxidation, C3 (propionyl) acylcarnitine (**Table S16**).

These differences in metabolic profiles extended to the brain (**Fig. S8; Table S16**). Echoing results from serum and liver, levels of long chain acylcarnitines were significantly elevated in the cerebral cortex of mice harboring the healthy donor microbiota compared to the undernourished donor microbiota ( $P < 0.05$ ; Student's t-test). Amino acid metabolism was also impacted with concentrations of histidine, proline, glycine, arginine, and citrulline being significantly higher in the brains of mice with the healthy donor's microbiota. Additionally, there was evidence of perturbations in the TCA cycle, with citrate levels being significantly higher in animals harboring the undernourished infant's gut community.

There were strong correlations between the relative abundances of bacterial species in the fecal microbiota of gnotobiotic mice and serum C10, C12, and C14 acylcarnitine levels, as well as levels of amino acids in gastrocnemius muscle. Species enriched in the healthy community that significantly correlated to serum acylcarnitines and amino acids included taxa that were also weight- and/or lean mass gain-discriminatory: *R. gnavus* (C10:2, C12, C12-OH/C10-DC acylcarnitines; valine, leucine/isoleucine, and methionine), *Dorea formicigenerans* (C10, C10:1, C12, C12-OH/C10-DC, C14, C14:2 acylcarnitines; methionine), *F. prausnitzii* (C12-OH/C10-DC, C14 acylcarnitines, leucine/isoleucine), and *Clostridium symbiosum* (C10:1, C12, C12-OH/C10-DC, C14 acylcarnitines; and 11 amino acids including valine, leucine/isoleucine, and methionine) ( $P < 0.05$ , see **Figs. 2, S2, S9A,B; Table S17** for a complete list with Spearman's ranked correlation  $\rho$ -values). *B. longum* and *F. prausnitzii*, the two age- and growth-discriminatory species, were also correlated with hepatic levels of the TCA cycle intermediate citrate ( $P < 0.05$ ; **Fig. S9C, Table S17**).

While these two donors' microbiota transmitted discordant weight, lean mass gain and metabolic phenotypes, they did not transmit discordant bone morphometric phenotypes ( $P > 0.05$  on all metrics; Student's t-test). This implies, perhaps not surprisingly, that 'anthropometrically undernourished' and 'anthropometrically healthy' donor microbiota do not transmit discrete sets of effects, but may produce overlapping phenotypes, each component of which may vary in its degree of discordance from donor to donor. A corollary is that different host phenotypes need to be assayed to obtain a more robust functional classification of 'healthy' versus 'undernourished' microbiota.

**Fig. S1.**

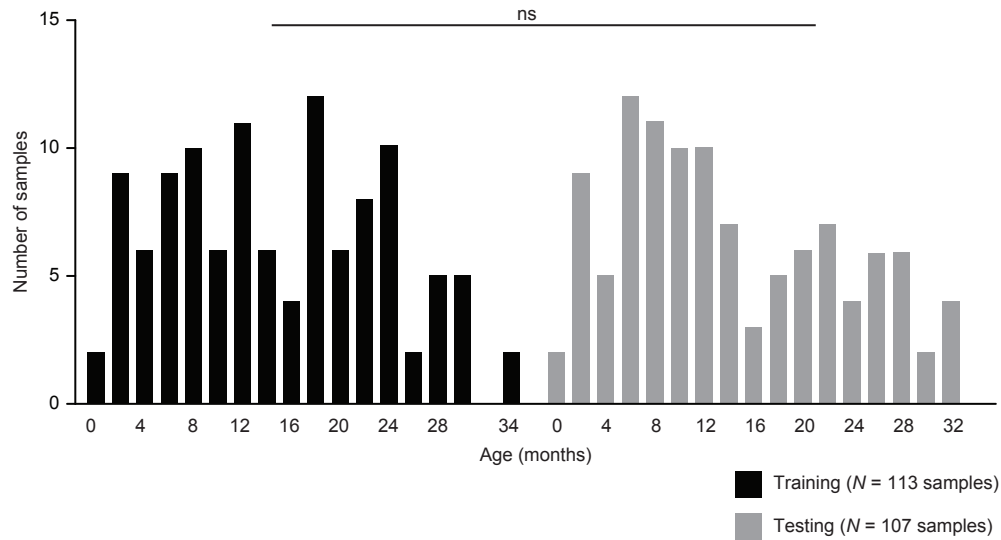

**Distribution of ages at the time of sample collection of healthy microbiota donors that were used to generate the Random Forests-derived model of age-discriminatory bacterial 97%ID OTUs.** Histogram of donor ages in the training set cohort ( $N = 113$  samples from 14 twin pairs and 1 set of triplets; minimum age 0.6 months, maximum age 33.51 months, median age 13.6 months) and testing set cohort ( $N = 107$  samples from 13 twin pairs and 1 set of triplets; minimum age 0.98 months, maximum age 31.8 months, median age 12.02 months). ns, no significant difference based on Kolmogorov-Smirnov test ( $P = 0.58$ ).



**Fig. S2.**

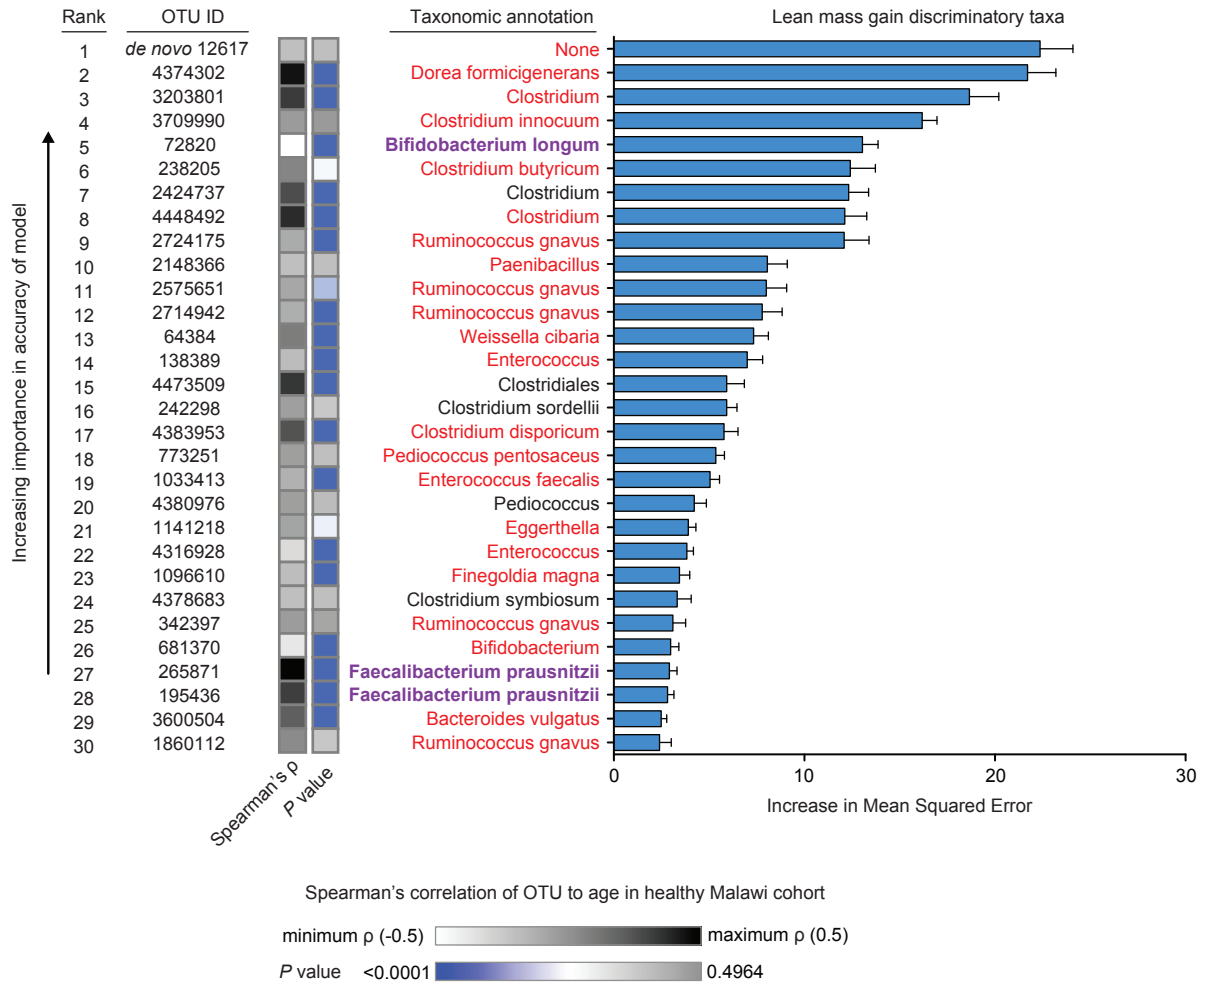

**Random Forests-derived model of lean body mass gain discriminatory OTUs.** The 30 most lean mass gain discriminatory OTUs with their taxonomic assignments, ranked by feature importance as determined by increase in mean squared error. The lean body mass gain model explained ~58% of the observed phenotypic variation ( $P < 0.0001$ , permutation test; 999 permutations). Models were iterated 100 times, and average mean squared error values were used to generate the final rankings. Red indicates OTUs that appear within the 30 most discriminatory OTUs for both the weight and lean mass gain models. Purple indicates species that also appear in the 25-taxa sparse model of Malawian microbiota maturation. Colors to the right of the OTU ID numbers represent Spearman's rank correlation of the same OTU ID to chronological age in the healthy Malawian infant/child cohort (**Table S9**).

**Fig. S3.**

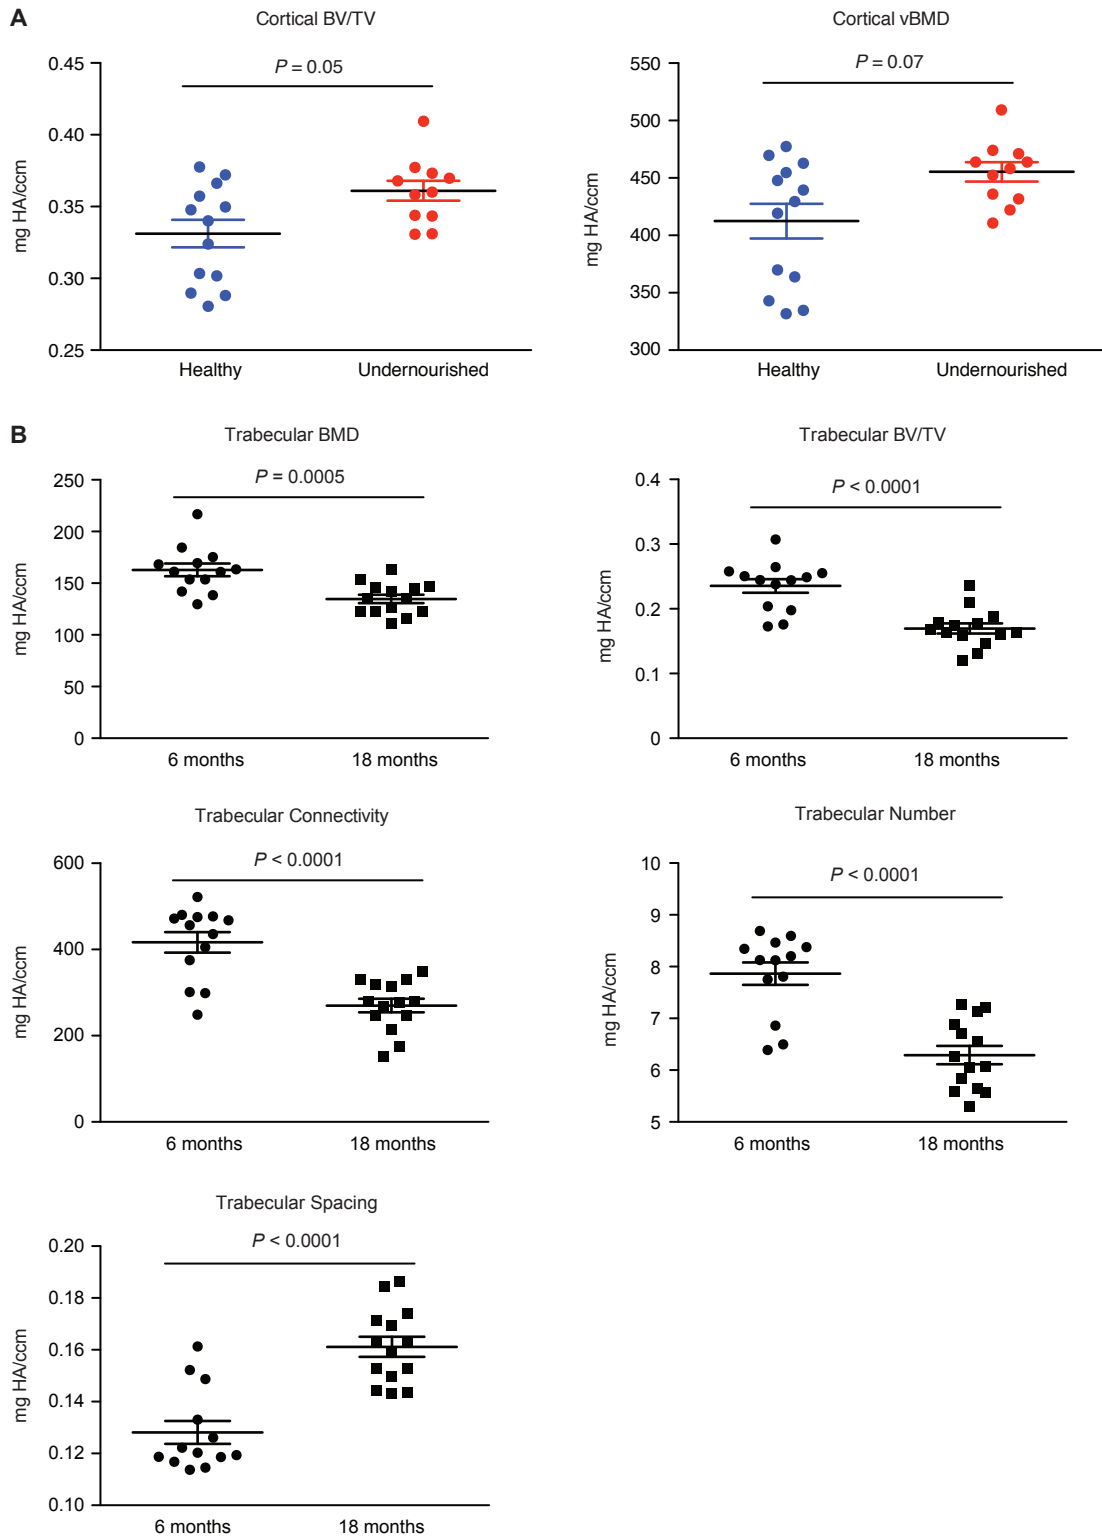

**Effects of microbiota donor health status and age on femoral bone morphology.**

Micro-CT was performed on femurs harvested from gnotobiotic mice colonized with microbiota from 6- and 18-month-old healthy or undernourished donors (in all cases, the efficiency of transplantation was >50%). Each circle represents a single mouse. **(A)** Bone morphometric phenotypes expressed as a function of donor nutritional status irrespective of donor age. Differences in the ratio of bone volume to tissue volume (BV/TV) and volumetric bone mineral density (vBMD) in the cortical region of femurs are shown. **(B)** Bone morphometric phenotypes expressed as a function of age, irrespective of donor nutritional status. Differences in trabecular bone mineral density (BMD), BV/TV, connectivity, number, and spacing are shown. *P* values are based on a Mann-Whitney test. Y-axis abbreviation; HA/ccm, hydroxyapatite per cubic centimeter.

**Fig. S4.**

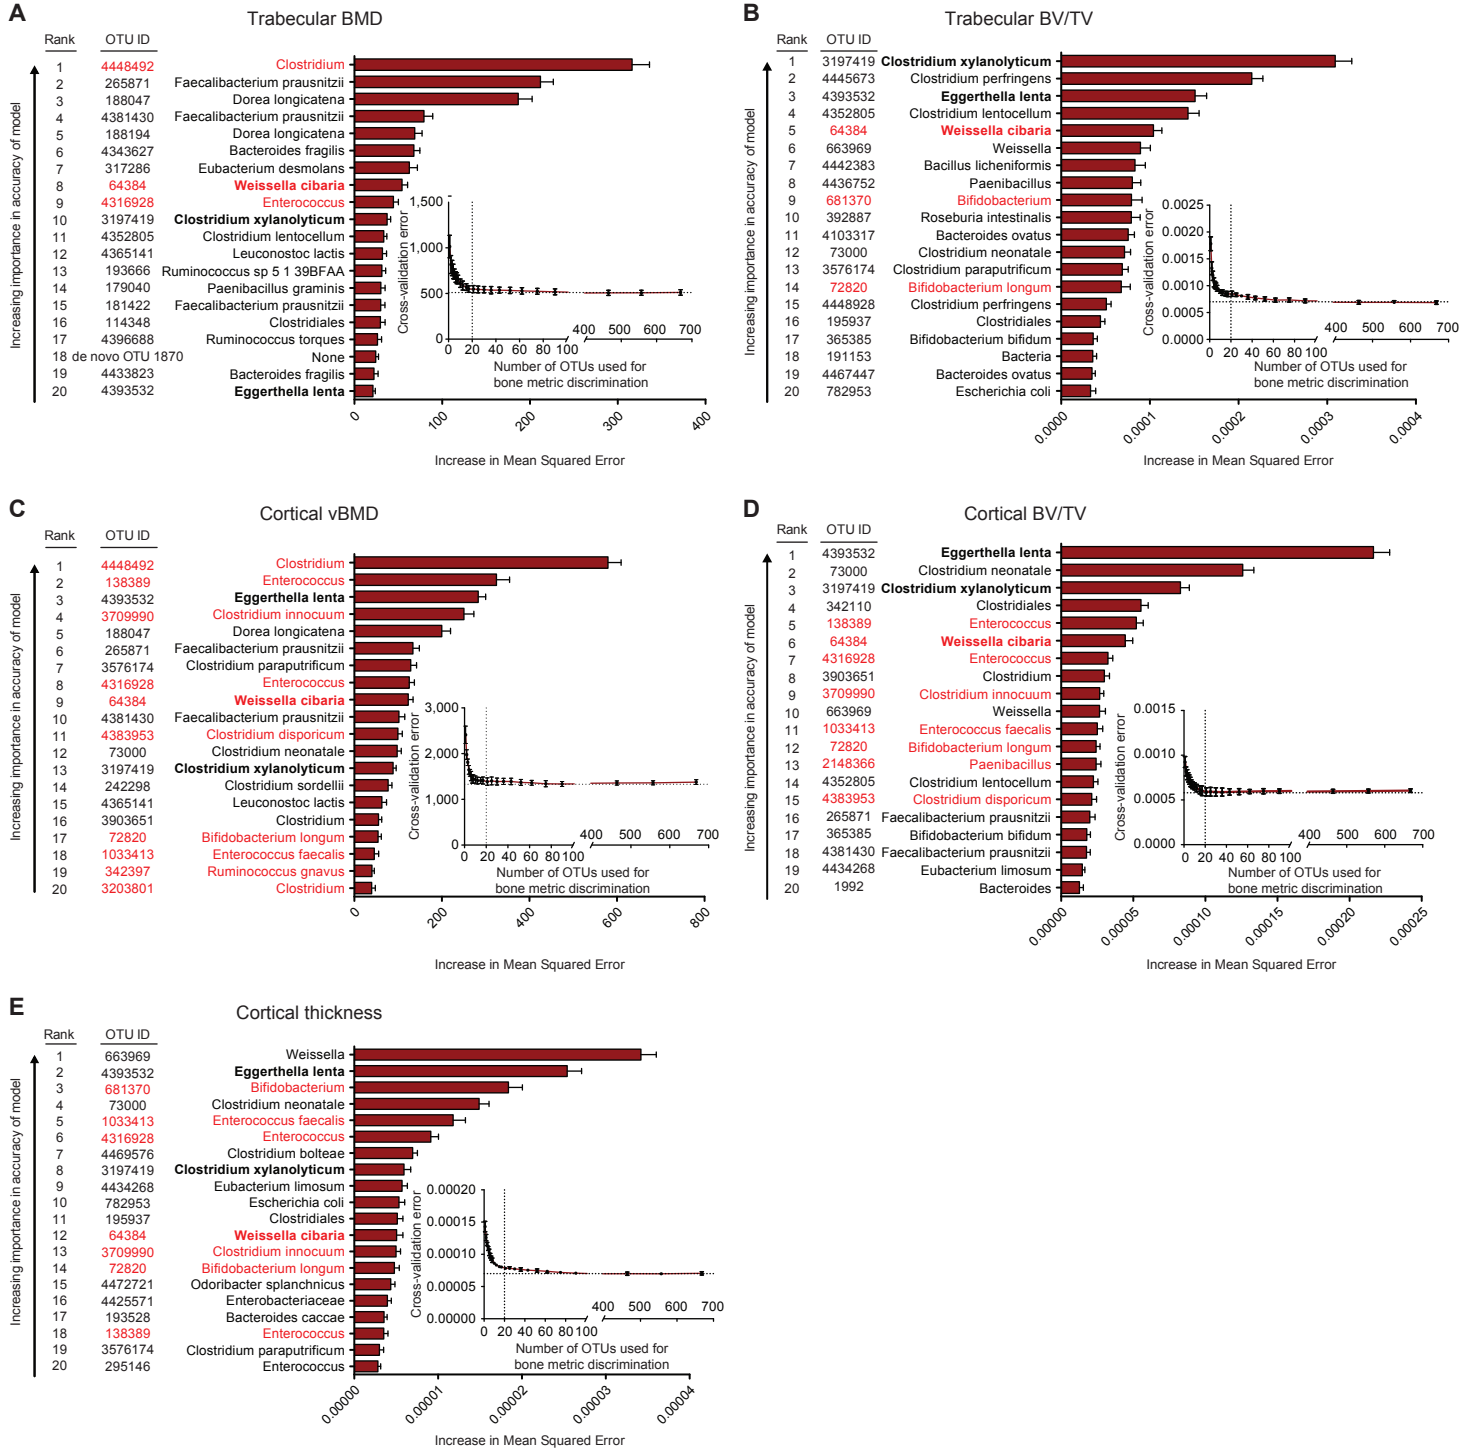

**Random Forests-derived models of OTUs that discriminate femoral bone metrics defined by micro-CT.** Top 20 most discriminatory OTUs, ranked by increase in mean squared error, for **(A)** trabecular bone mineral density, **(B)** trabecular bone volume per tissue volume, **(C)** cortical volumetric bone mineral density, **(D)** cortical bone volume per tissue volume, and **(E)** cortical thickness. Insets show cross-validation of each model; error decreases as OTUs are added to the model. Red indicates that the OTU is also among the top 30 ranked OTUs the Random Forests-derived models of both weight- and lean mass gain-discriminatory taxa. Boldface indicates that the OTU appears in all five bone metric models.

**Fig. S5.**

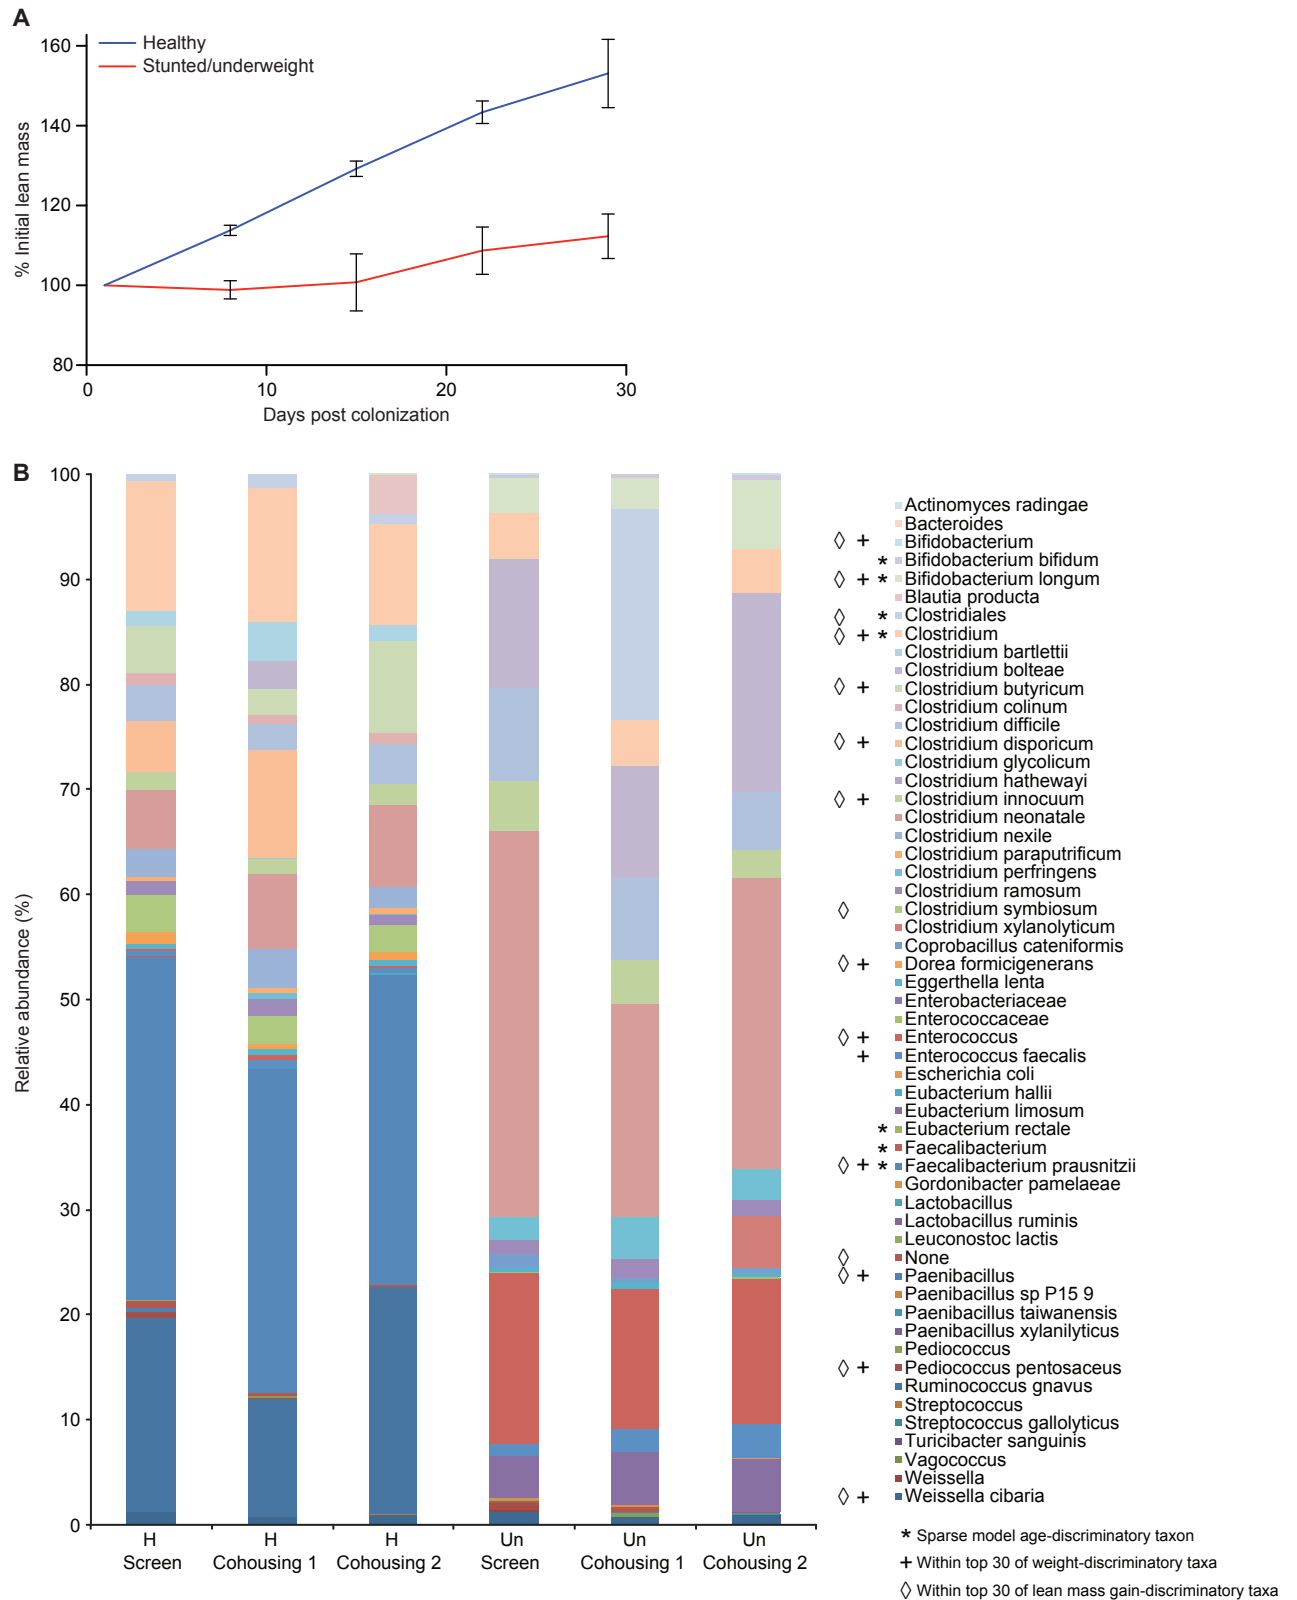

**Discordant growth phenotypes transmitted by two exemplary iLiNS-DYAD-M donor gut communities: one from a healthy 6-month-old donor with normal gut microbiota maturity and the other from a severely stunted/underweight 6-month-old donor with significant microbiota immaturity.** (A) Gain of lean body mass ( $N = 5$  recipients/donor microbiota). Mean $\pm$ SEM values are shown.  $P < 0.0001$  (2-way ANOVA). (B) Bacterial composition of the fecal microbiota of gnotobiotic mice in the cohousing experiments (relative abundances, averaged over all time points, of taxa from all animals in each treatment group). Abbreviations: ‘screen’, initial survey of mice harboring donor microbiota; ‘H’, cagemates colonized with the healthy donor’s microbiota in each cohousing experiment; ‘Un’, cagemates colonized with the severely stunted/underweight donor’s microbiota.

**Fig. S6A.**

**Central carbohydrate metabolism and fermentation**

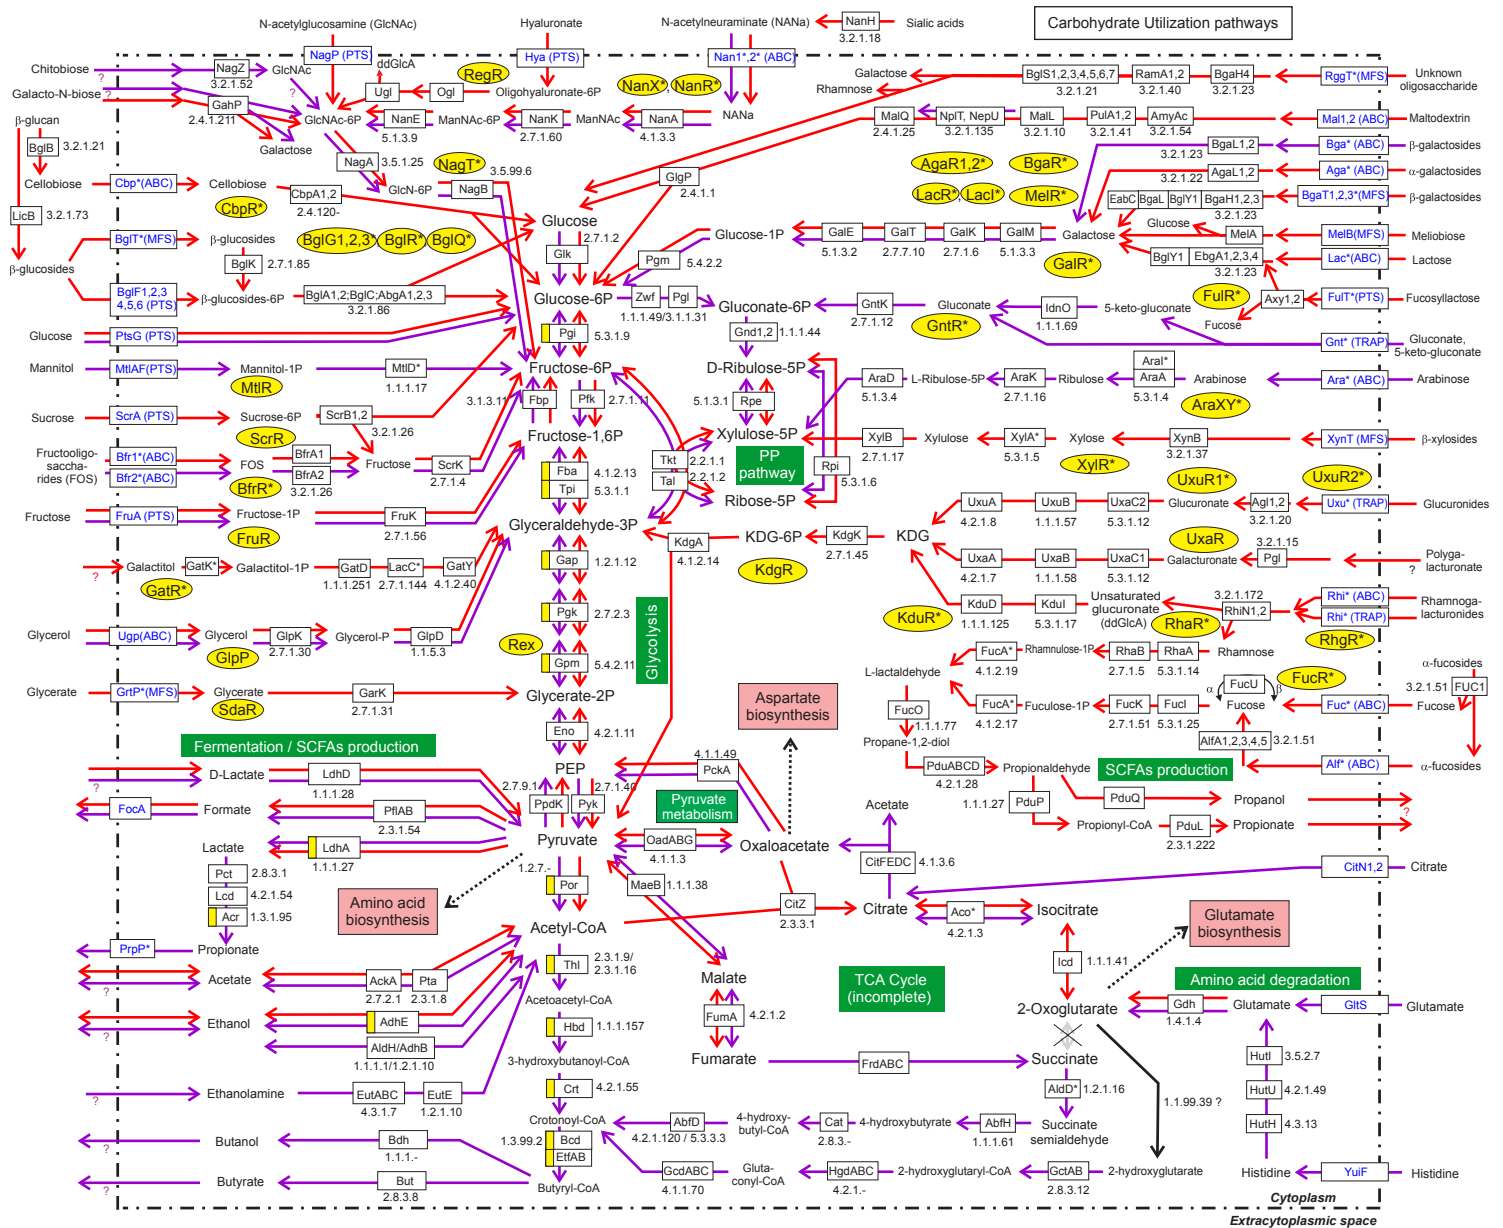

Cytoplasm  
Extracytoplasmic space



Fig. S6B.

# Amino Acid Biosynthesis

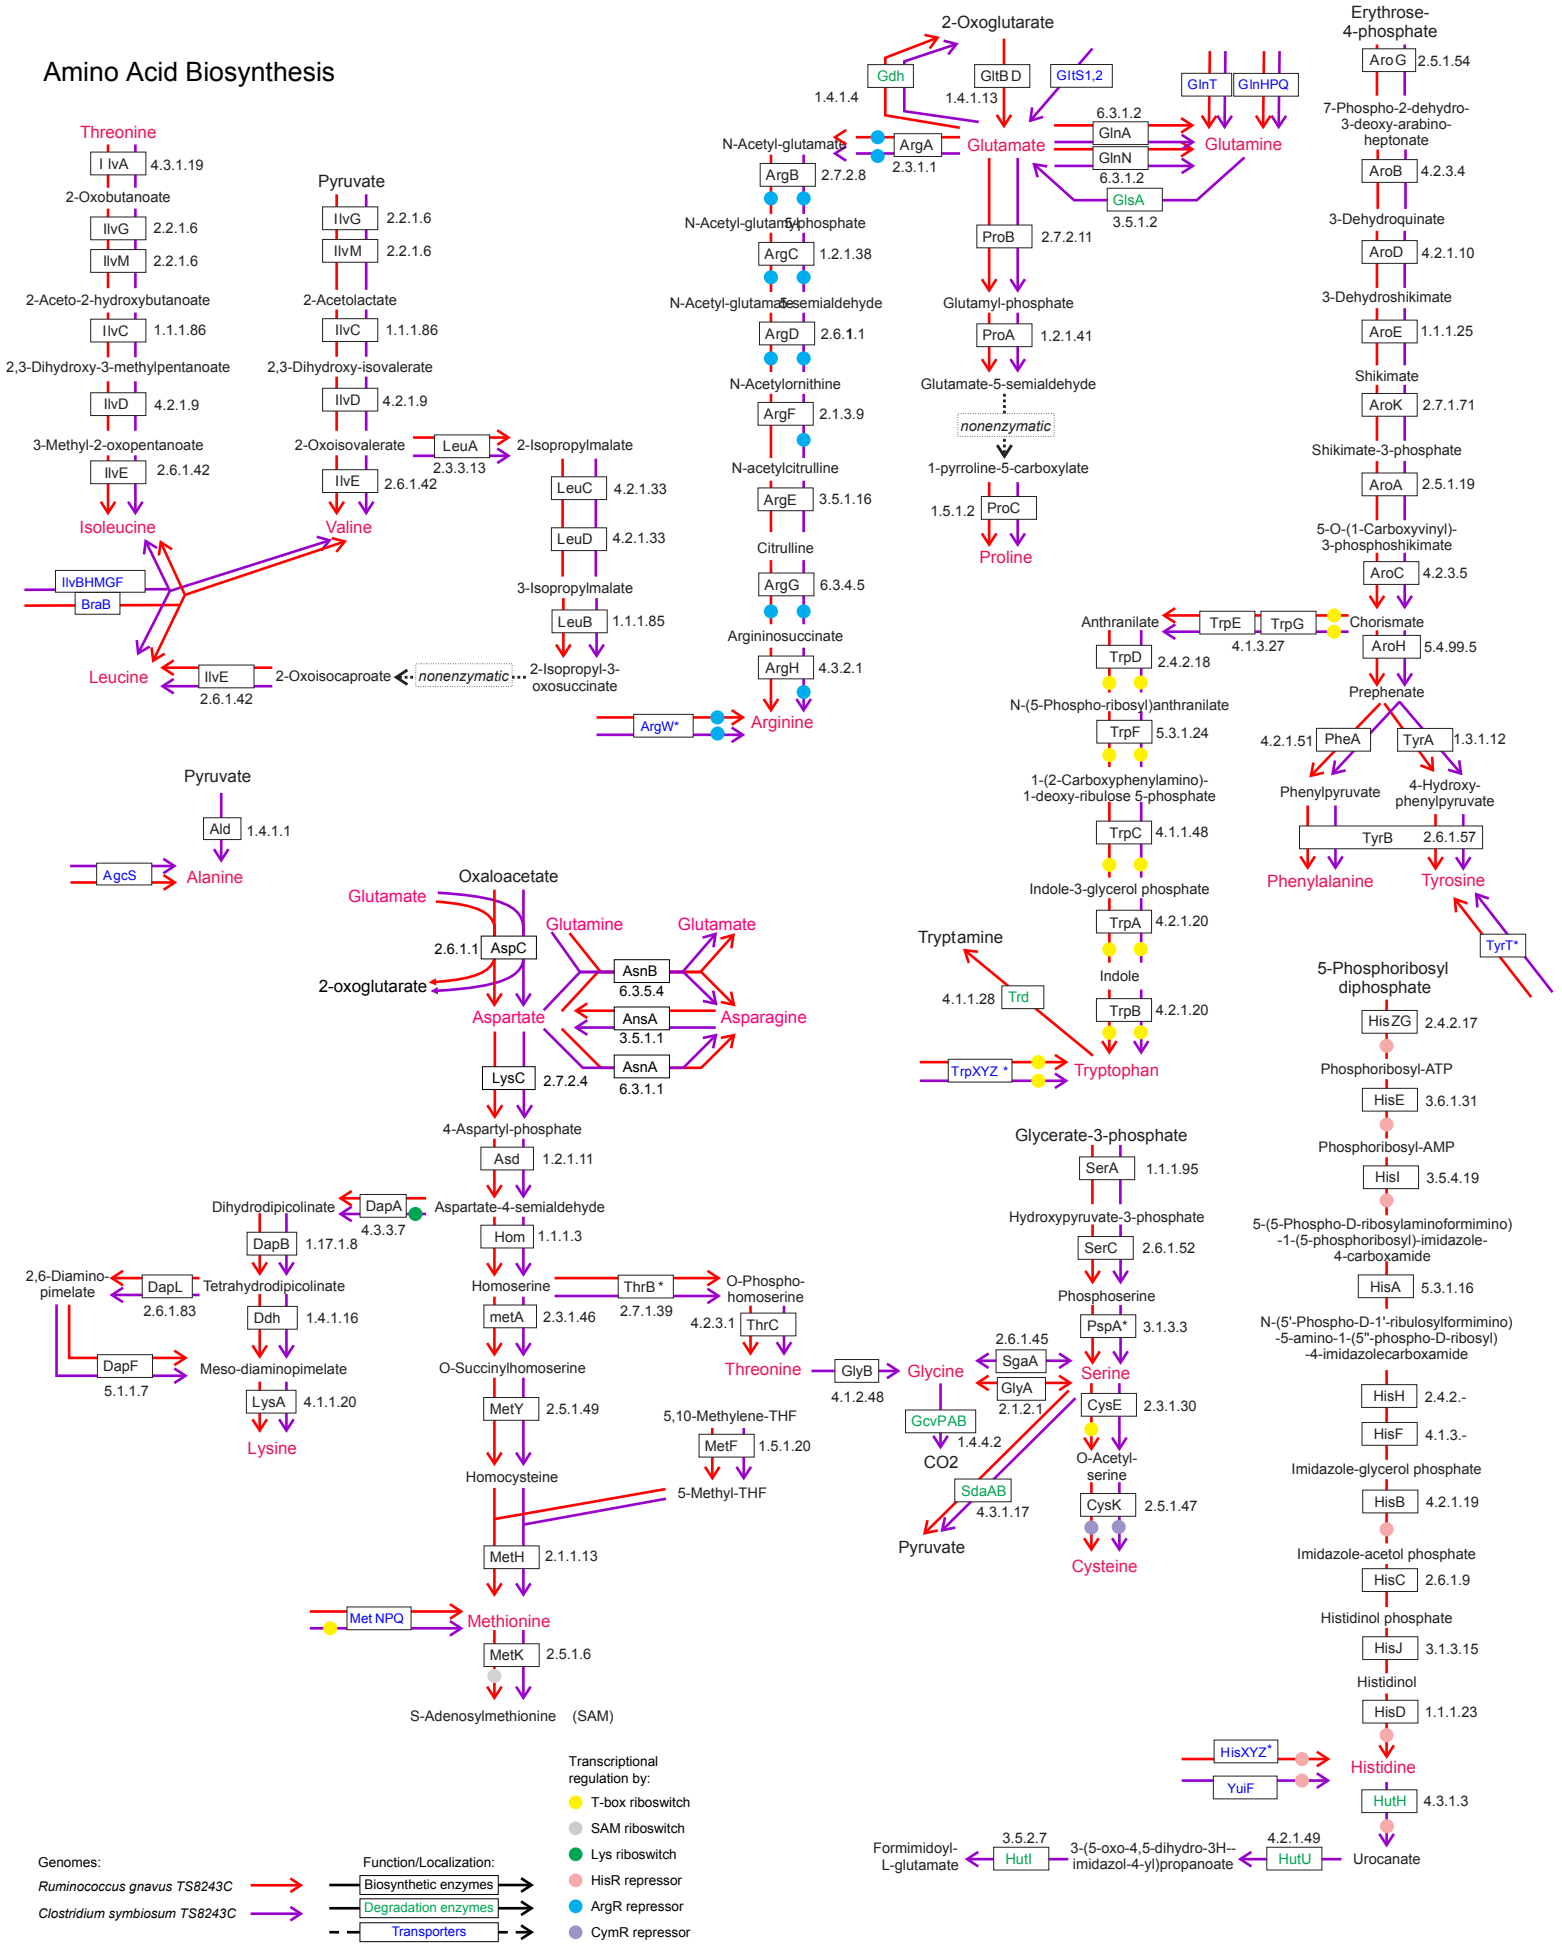

**Fig. S6C.**

**Vitamin and Cofactor Biosynthesis**

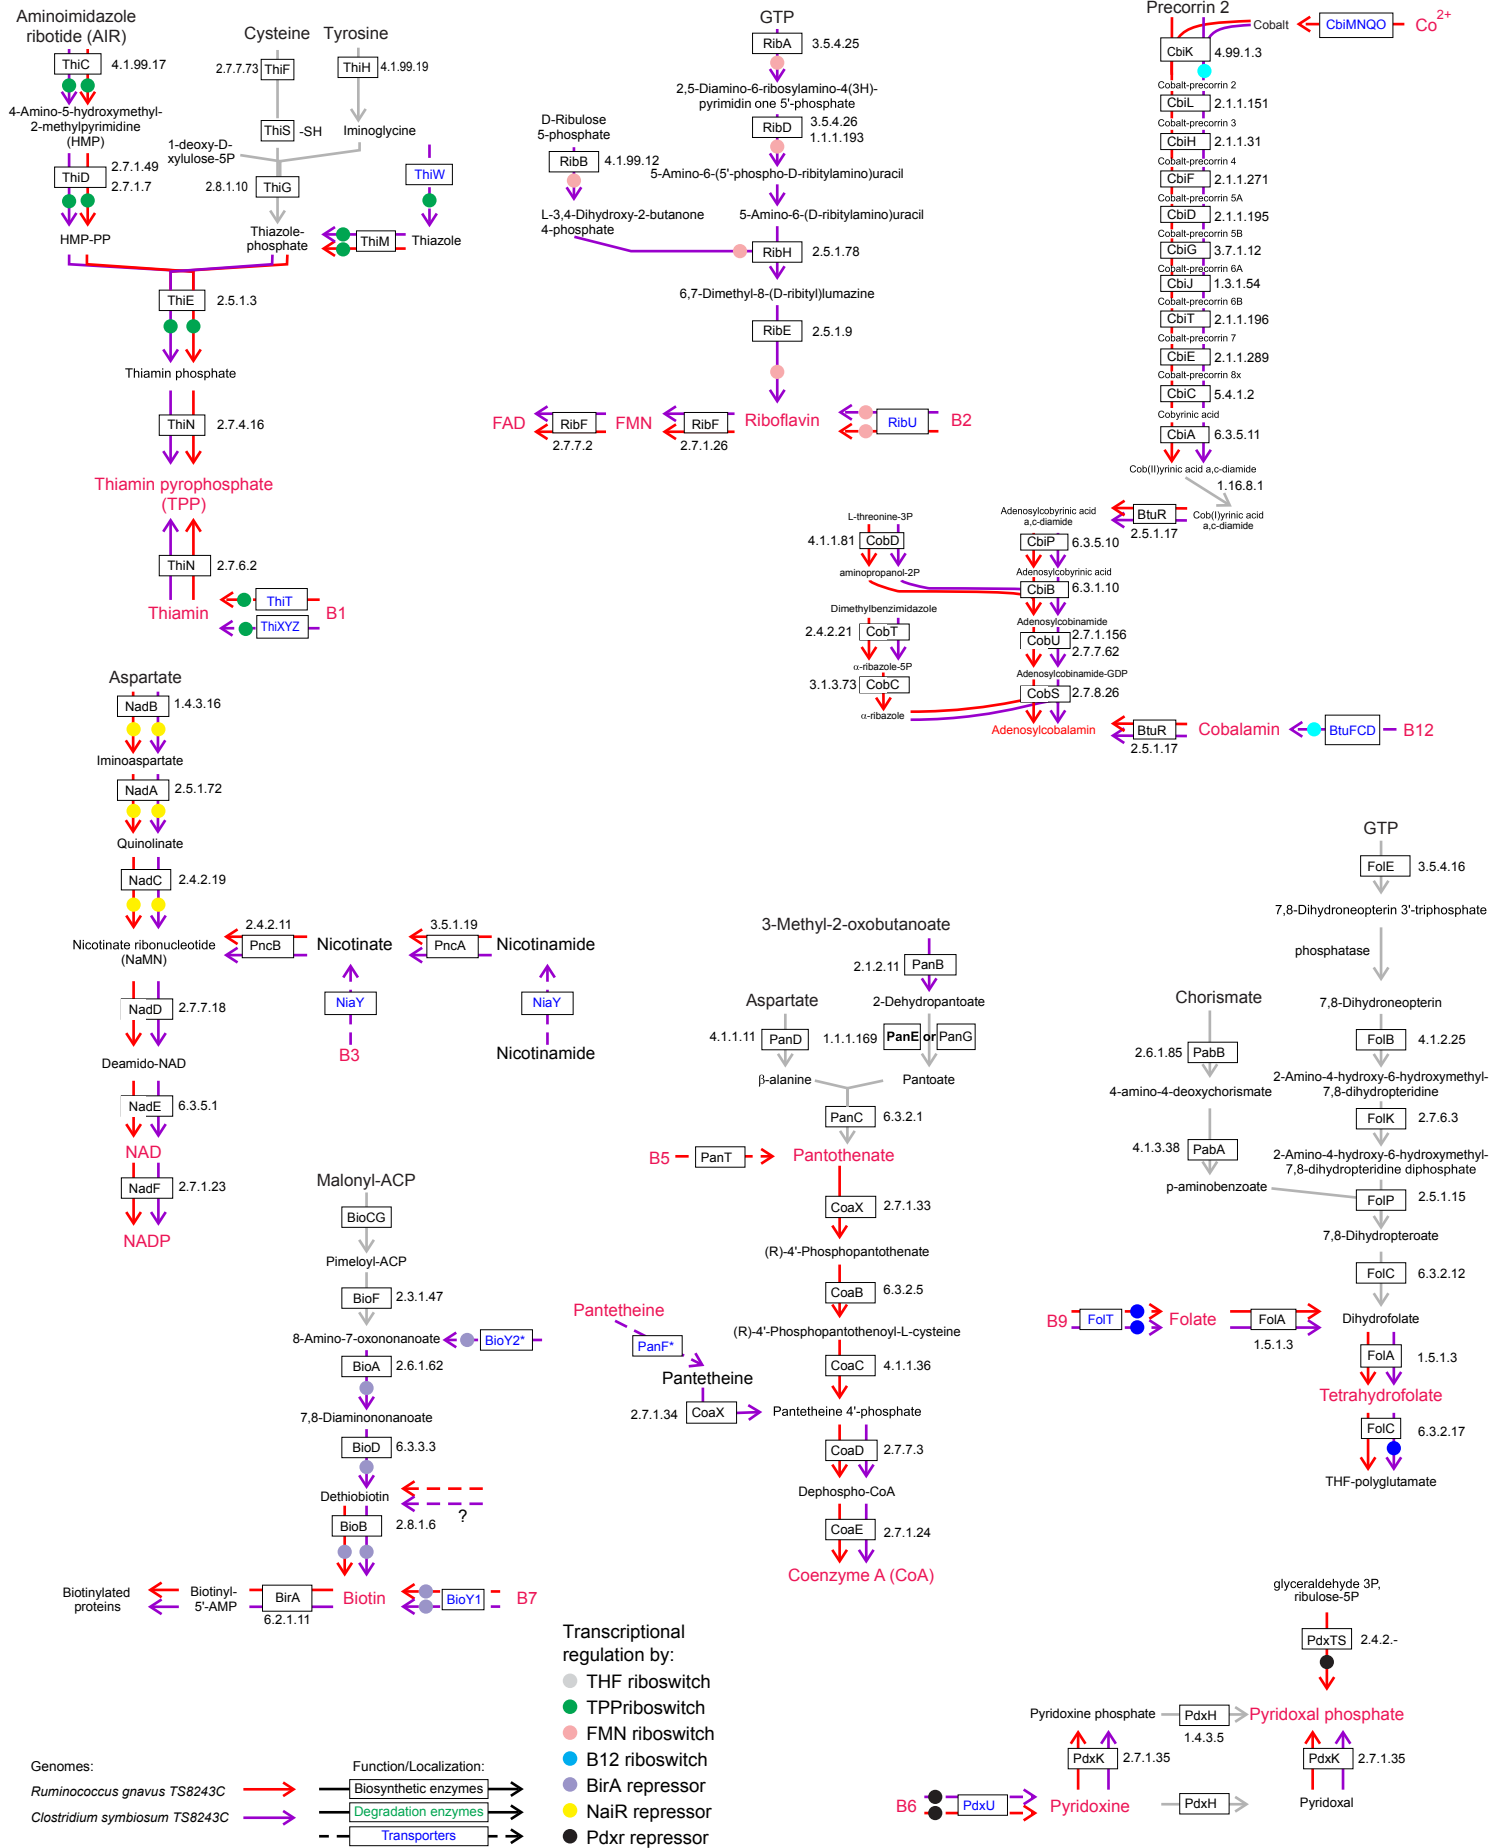

**Reconstructed *Ruminococcus gnavus* TS8243C and *Clostridium symbiosum* TS8243C metabolic pathways involved in carbohydrate and central carbon metabolism, amino acid biosynthesis and degradation, and vitamin and cofactor biosynthesis.**

Enzymatic reactions and transporters are depicted by solid and dashed lines, respectively. Red and purple lines indicate the presence of the enzyme or transporter in the cultured strains of *R. gnavus* and *C. symbiosum*, respectively, while gray lines indicate absence of the enzyme or transporter in either strain. Common names of enzymes and transporters are shown in black and blue font, respectively. Enzymes are also identified by their enzyme commission (EC) numbers. Major families of carbohydrate transporters indicated in parentheses are ATP-Binding Cassette (ABC) transporters, Major Facilitator Superfamily (MFS) permeases, TRipartite ATP-independent Periplasmic (TRAP) transporters, and phosphoenolpyruvate-dependent PhosphoTransferase System (PTS) transporters. Cognate transcriptional regulators of sugar utilization pathways are highlighted in yellow ovals. Central carbon metabolism genes controlled by the global redox-responsive regulator Rex in both genomes are marked by yellow vertical stripes. Genes involved in amino acid and vitamin metabolism that are controlled by local regulators and metabolite responsive riboswitches are denoted by colored circles. Gene locus tags and functional annotations are listed in **Table S13**. Genes with novel predicted functions are marked with an asterisk. Putative pathways and transporters for which no gene annotation could be identified are indicated with a question mark.

**(A) Carbon and energy: central carbon metabolism, carbohydrate utilization, and short chain fatty acid production**

*Central carbon metabolism* – Both the *R. gnavus* and *C. symbiosum* strains possess the complete glycolysis/gluconeogenesis and pentose phosphate (PP) pathways, as well as the key enzymes involved in conversion of pyruvate to acetyl-CoA or oxaloacetate, and reverse conversion of oxaloacetate to phosphoenolpyruvate (PEP). The PP pathway in *C. symbiosum* includes multiple paralogs of genes encoding transketolase (TktAB) and transaldolase (Tal). In addition, *C. symbiosum* (but not *R. gnavus*) encodes the oxidative pathway for utilization of glucose-6 phosphate via the PP pathway (Zwf, Pgl, Gnd). The tricarboxylic acid (TCA) cycle is incomplete in both strains. In *R. gnavus*, it involves two parts: (i) interconversion of pyruvate to malate and fumarate, and (ii) fusion of oxaloacetate and acetyl-CoA to produce 2-oxoglutarate, a key precursor for glutamate biosynthesis. *C. symbiosum* possesses only the former pathway for conversion of pyruvate to malate and fumarate.

*Carbohydrate utilization (CU) pathways* – The reconstructed carbohydrate utilization (CU) potential of the two Malawian TS8243C strains differ substantially and include novel carbohydrate-specific regulators, transporters, and enzymes that are not orthologous to previously characterized proteins. *R. gnavus* has 28 predicted novel regulators, most of which belong to the AraC family, and 35 transporter genes encoding 16 transporter complexes (including 7 ABC transporters). *C. symbiosum* contains 5 novel regulators from various structural families and 17 transporter genes (5 ABC transporter complexes). Notable novel monosaccharide catabolizing enzymes include xylose isomerase (XylA), tagatose-6P isomerase (LacC), galactitol kinase (GatK), and bifunctional fucose-6P/rhamnose-6P aldolase (FucA) in *R. gnavus*, as well as arabinose isomerase (AraI) and mannitol dehydrogenase (MtlD) in *C. symbiosum*.

*R. gnavus* has predicted pathways for utilization of glucose, fructose and its oligosaccharides, sucrose, lactose, galactosides, fucose and fucosides, N-acetylglucosamine, galacto-N-biose, N-acetylneuraminate, sialic acids, beta-xylosides, rhamnogalacturonides, glucuronides, polygalacturonate, maltodextrins, beta-glucosides and cellobiose, meliobiose, fucosyllactose, hyaluronate and galactitol. *C. symbiosum* is predicted to utilize glucose, fructose, beta-galactosides, N-acetylneuraminate, chitobiose, galacto-N-biose, arabinose, mannitol and gluconate.

*Utilization of other carbon sources* – *R. gnavus* and *C. symbiosum* have shared and unique pathways for utilization of other carbon sources. Both strains share the glycerol and D-lactate utilization pathways. *C. symbiosum* has unique pathways for utilization of ethanolamine and citrate. *R. gnavus* has a unique pathway for utilization of D-glycerate.

*Short-chain fatty acid (SCFA) production* – *R. gnavus* and *C. symbiosum* possess both shared and strain-specific pathways for fermentation of various carbon sources and production of SCFAs. Both strains have complete pathways for production of formate, lactate, acetate and ethanol from pyruvate. *R. gnavus* has a unique pathway for production of propionate/propanol by fermentation of fucose and rhamnose. This pathway involves lactaldehyde reductase (FucO) and B<sub>12</sub>-dependent propanediol dehydratase (PduABCD), plus several other downstream enzymes for conversion of propionaldehyde to propionate and propanol. *C. symbiosum* has the complete pathway for conversion of acetyl-CoA to butyrate and butanol via crotonoyl-CoA and butyryl-CoA intermediates. Most of the butyrate synthesis pathway genes are organized into a single locus controlled by the Rex repressor. *C. symbiosum* also has the complete pathway for further conversion of lactate to propionate, which involves propionate CoA-transferase (Pct), lactoyl-CoA dehydratase (Lcd), acryloyl-CoA reductase (Acr) and is equipped with predicted propionate permease (PrpP\*) for end product excretion. Thus, *C. symbiosum* and *R. gnavus* possess distinct pathways for production of propionate.

## **(B) Amino acids**

Both strains are capable of synthesizing most amino acids *de novo*. The histidine biosynthesis pathway in *R. gnavus* is composed of 11 committed enzymes, most of which are organized into a single operon controlled by a HisR repressor. The HisR regulon in *R. gnavus* also includes the predicted ABC-type His transporter HisXYZ\* suggesting it can also salvage exogenous His. In contrast, the reconstructed HisR regulon in *C. symbiosum* includes the *hutH-yuiF* operon involved in His uptake and degradation; other His degradation genes were also identified in its genome. Thus, *C. symbiosum* is a predicted His auxotroph able to salvage exogenous His and use it both for protein synthesis and as a source of carbon, energy and nitrogen. Glutamate is synthesized from 2-oxoglutarate using the committed enzyme glutamate synthase GltBD, which is present in *R. gnavus* but not in *C. symbiosum*, suggesting the latter is a Glu auxotroph. In support of this prediction, there are two copies of the glutamate uptake transporter gene *gltS* in *C. symbiosum* but not in *R. gnavus*. Furthermore, *C. symbiosum* but not *R. gnavus* has a unique pathway for degradation of exogenous glutamate to produce butyrate.

In addition to the His and Glu uptake transporters described above, specific amino acid transporters were predicted for arginine, tyrosine, tryptophan, glutamine, branched chain amino acids (isoleucine/leucine/valine), alanine and methionine. These transporters are present in both *R. gnavus* and *C. symbiosum* suggesting that they can salvage these

amino acids from the environment, thus providing an alternative way to supply their biosynthetic needs. Tryptophan is a precursor of the neurotransmitter tryptamine. In contrast to *C. symbiosum*, *R. gnavus* contains a tryptophan decarboxylase ortholog (Trd) suggesting that is able to produce tryptamine.

### (C) B-vitamins

*Thiamin (vitamin B1)* is a common precursor of thiamin pyrophosphate (TPP), an essential cofactor of several ubiquitous enzymes in central carbon metabolism, most notably the pyruvate dehydrogenase complex. Neither *R. gnavus* nor *C. symbiosum* have a complete set of enzymes for *de novo* synthesis of TPP, and thus should be considered B1 auxotrophs. Both strains contain the thiamin salvage enzyme ThiN (thiamin pyrophosphokinase). The B1-specific transporter ThiT was identified in *R. gnavus*, but not in *C. symbiosum*. Alternatively, or in addition to thiamin salvage, both strains are capable of synthesizing TPP using exogenous thiazole via the dedicated salvage enzyme ThiM (hydroxyethylthiazole kinase). However, the respective thiazole transporter, ThiW was confidently identified only in *C. symbiosum*. Both strains have the complete machinery for production of the second biosynthetic intermediate (HMP-PP), joining it with thiazole-P, and downstream phosphorylation to yield the mature TPP cofactor. *C. symbiosum*, but not *R. gnavus*, also has the dedicated transporter ThiXYZ for the opportunistic salvage of the HMP intermediate.

*Riboflavin (vitamin B2)* is a precursor and biosynthetic intermediate of the essential redox cofactors flavin mononucleotide (FMN) and flavin adenine dinucleotide (FAD). The complete canonical *de novo* riboflavin biosynthetic pathway, from GTP and D-ribulose-5-phosphate, is present in *C. symbiosum* but absent in *R. gnavus*. This is one of the two primary distinctions between these two strains, which are otherwise quite similar in terms of B-vitamin proto- and auxotrophies. *R. gnavus*, unlike *C. symbiosum*, lacks fumarate reductase, one of the primary flavin-dependent enzymes in central carbon metabolism. Both strains have a committed riboflavin transporter RibU, plus an essential bi-functional enzyme RibF for converting riboflavin to FMN and FAD. A FMN-sensitive riboswitch is present to regulate RibU expression in both strains and *de novo* synthesis in *C. symbiosum*.

*Niacin (vitamin B3)*, or nicotinic acid, as well as nicotinamide are converted to the most abundant redox cofactors, NAD and NADP; these cofactors are collectively involved in ~10% of all cellular biochemical transformations. Reconstruction of this subsystem in both *R. gnavus* and *C. symbiosum* includes both *de novo* synthesis of NAD from aspartate (prototrophy), and potential (optional) salvage of B3 and its amidated precursor. However, the B3 transporter NiaY is only present in *C. symbiosum*. In the absence of additional data, it is impossible to distinguish between two possible interpretations: (i) *R. gnavus* has a B3 transporter of another, yet unknown, type or (ii) the enzymes PncA and PncB are predominantly involved in recycling of intracellular nicotinamide, a well-known product of NAD degradation.

*Pantothenate (vitamin B5)* is an intermediate in the biosynthesis of coenzyme A (CoA), an indispensable cofactor in a variety of acyl transfer reactions, most importantly in fatty acid biosynthesis, degradation and the TCA cycle. Both strains lack components for *de novo* synthesis of pantothenate. However, auxotrophy is fully applicable only to *R. gnavus*, which has a complete set of downstream enzymes for the 5-step conversion of pantothenate to CoA. An interesting distinction of *C. symbiosum* is the absence of two

enzymes CoaB and CoaC. Pantetheine, a product of CoA degradation, can be phosphorylated (apparently via the second activity of pantothenate kinase), bypassing CoaBC-mediated steps, yielding a substrate for the next step catalyzed by CoaD. Therefore, *C. symbiosum* should be considered a pantetheine rather than a pantothenate auxotroph.

*Pyridoxine (B6)* is a precursor of the pyridoxal phosphate (PLP) cofactor that drives numerous transamination, decarboxylation and epimerization reactions of various amino acids. This pathway reveals a second major phenotypic distinction between *R. gnavus* and *C. symbiosum*. In contrast to the pattern with vitamin B2, *C. symbiosum* is a B6 auxotroph, whereas *R. gnavus* is a B6 prototroph. Consistent with this conclusion, only *C. symbiosum* contains a B6 transporter (PdxU).

*Biotin (B7)* is the critical cofactor in transcarboxylation reactions (including the initiation of fatty acid synthesis); it performs its function after covalent attachment to carrier protein(s) by the universally conserved and essential enzyme BirA (biotin ligase). Neither *R. gnavus* nor *C. symbiosum* has recognizable enzymes involved in the upstream steps of B7 biosynthesis, including the critical enzyme BioF (8-amino-7-oxononanoate synthase). Both strains contain the biotin transporter BioY, predicted to be under control of the same transcriptional repressor (the second function of the bifunctional protein BirA). However, both species also contain BioB, pointing to dethiobiotin as a potential alternative vitamin. Moreover, the presence of BioA and BioD, upstream of BioB, in *C. symbiosum* (but not in *R. gnavus*) points to two other possibilities; (i) salvage of 8-amino-7-oxononanoate as yet another undocumented vitamin, and (ii) an alternative upstream pathway merging with the canonical route at the stage of 8-amino-7-oxononanoate. The first possibility appears more likely, and is indirectly supported by the presence of the second BioY paralog in *C. symbiosum* (but not in *R. gnavus*) in the chromosomal neighborhood of the *bioA-bioB* operon. The second possibility would make *C. symbiosum* a B7 prototroph.

*Folate (B9)* is a precursor of folate-derived cofactors DHF, THF and its polyglutamate derivatives that play a critical role in single carbon metabolism, including numerous methylation reactions. Both strains are obvious B9 auxotrophs containing only downstream enzymes and the folate transporter FolT. In *C. symbiosum*, this transporter and FolC are under regulation of the THF-responding riboswitch.

*Cobalamin (B12)* is involved in a limited number of very important reactions (e.g., methionine biosynthesis). Both analyzed strains have a complete B12 biosynthesis pathway. In addition, *C. symbiosum* (but not *R. gnavus*) contains the B12-specific transporter BtuFCD under regulation of a B12 riboswitch.

**Fig. S7.**

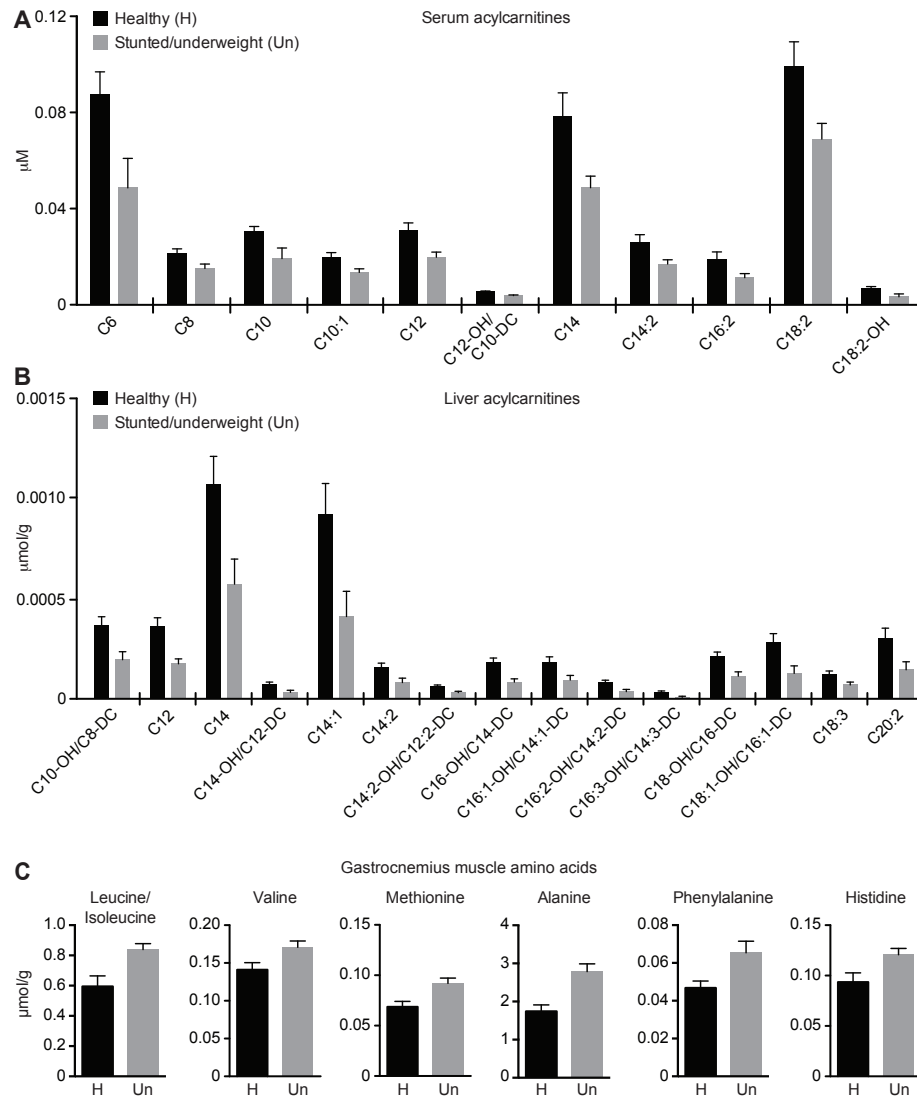

**Metabolic features that distinguish gnotobiotic mice colonized with a microbiota from a 6-month-old healthy infant or an immature microbiota from a 6-month-old severely stunted/underweight infant.** Metabolic profiles generated by targeted mass spectrometry of (A) acylcarnitines in serum (B) acylcarnitines in liver, and (C) amino acids in gastrocnemius muscle. Each metabolite's concentration differs significantly between the two recipient groups of mice ( $P < 0.05$ ; Student's t-test).

**Fig. S8.**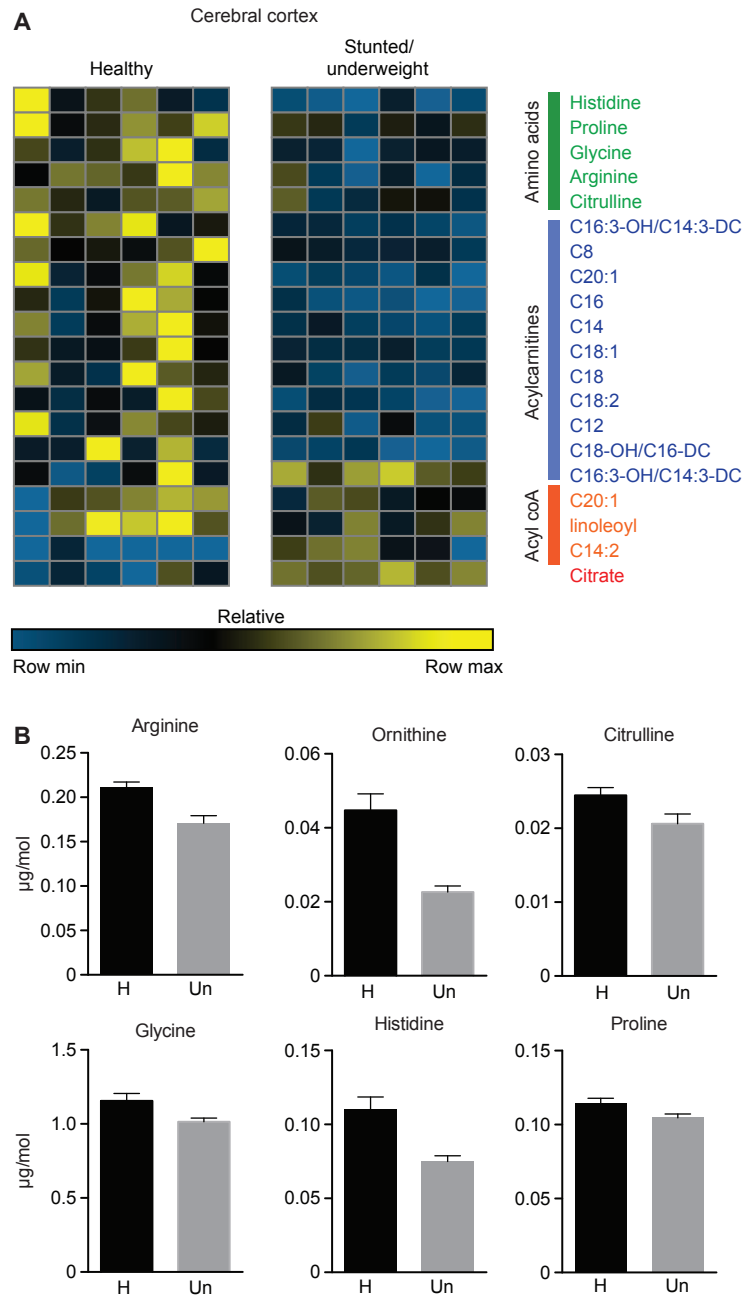

**Differences in brain metabolism in gnotobiotic recipients of 6-month-old healthy compared to severely stunted/underweight donor microbiota. (A)** Metabolic profile of the cerebral cortex recovered at sacrifice. Columns represent individual animals. Rows represent metabolites whose concentrations are significantly different between the two treatment groups ( $P < 0.05$  for all metabolites shown, Student's t-test). **(B)** Concentrations of amino acids in the cerebral cortex of mice colonized with the healthy (H) or stunted/underweight (Un) donor microbiota (mean $\pm$ SEM values plotted;  $P < 0.05$  for all metabolites shown; Student's t-test).



**Fig. S9.**

**A** Acylcarnitines

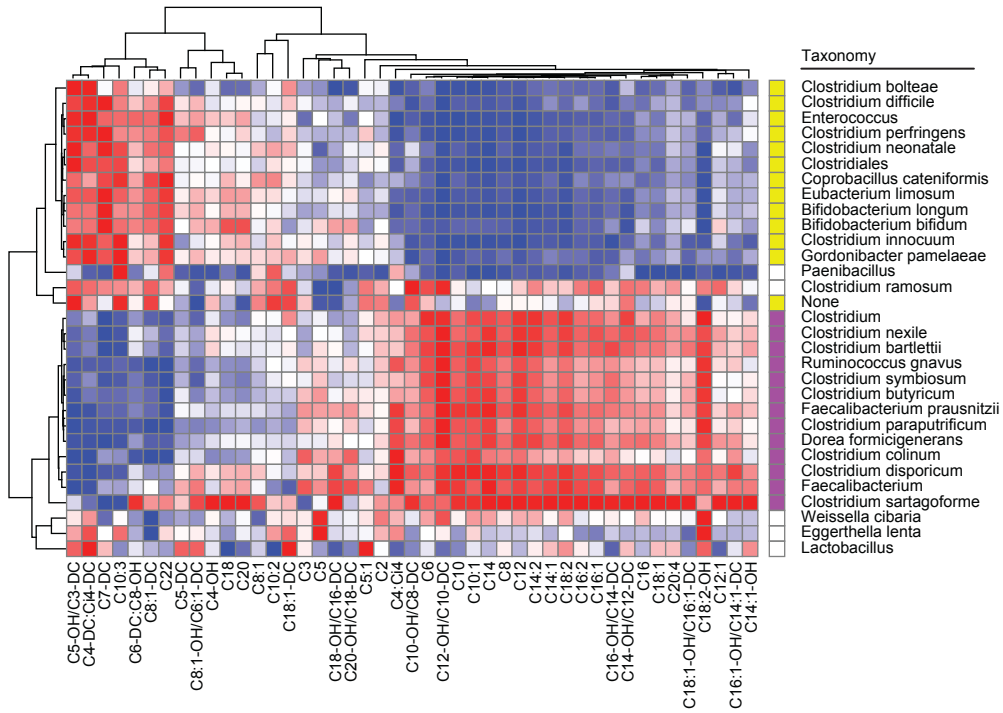

**B** Amino acids

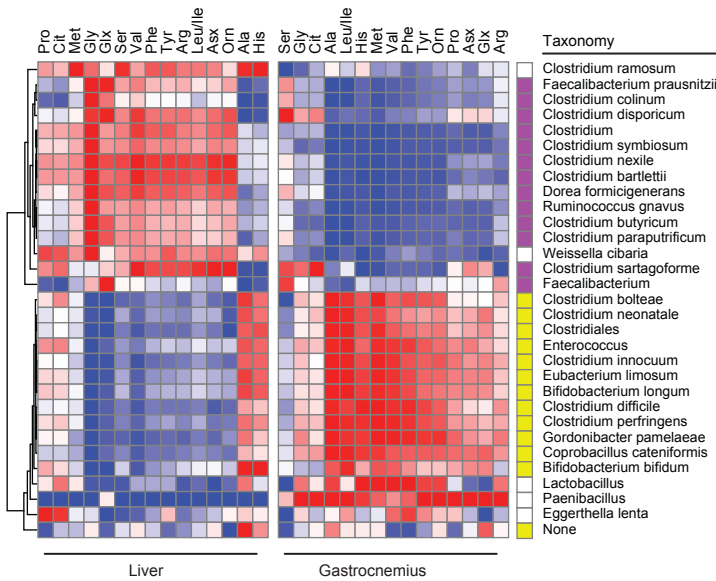

**C** Organic acids

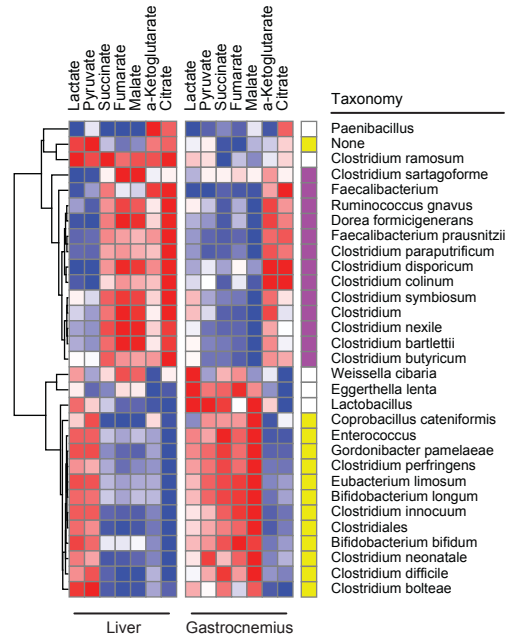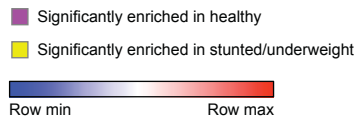

**Spearman's rank correlation coefficients for bacterial species relative abundances in the fecal microbiota versus concentrations of metabolites in gnotobiotic mouse recipients of healthy and severely stunted/underweight infant donor gut communities.** Spearman correlations involving (A) acylcarnitines in serum, (B) amino acids in liver and gastrocnemius muscle, and (C) organic acids in liver and gastrocnemius muscle. Rows are hierarchically clustered based on pairwise distances calculated from Pearson correlation values. Bars to the right of each heatmap indicate significant species enrichment ( $P < 0.05$ ; Student's t-test) in the fecal microbiota of mice colonized with the healthy (purple) or stunted/underweight (yellow) donor's gut community.

**Fig. S10.**

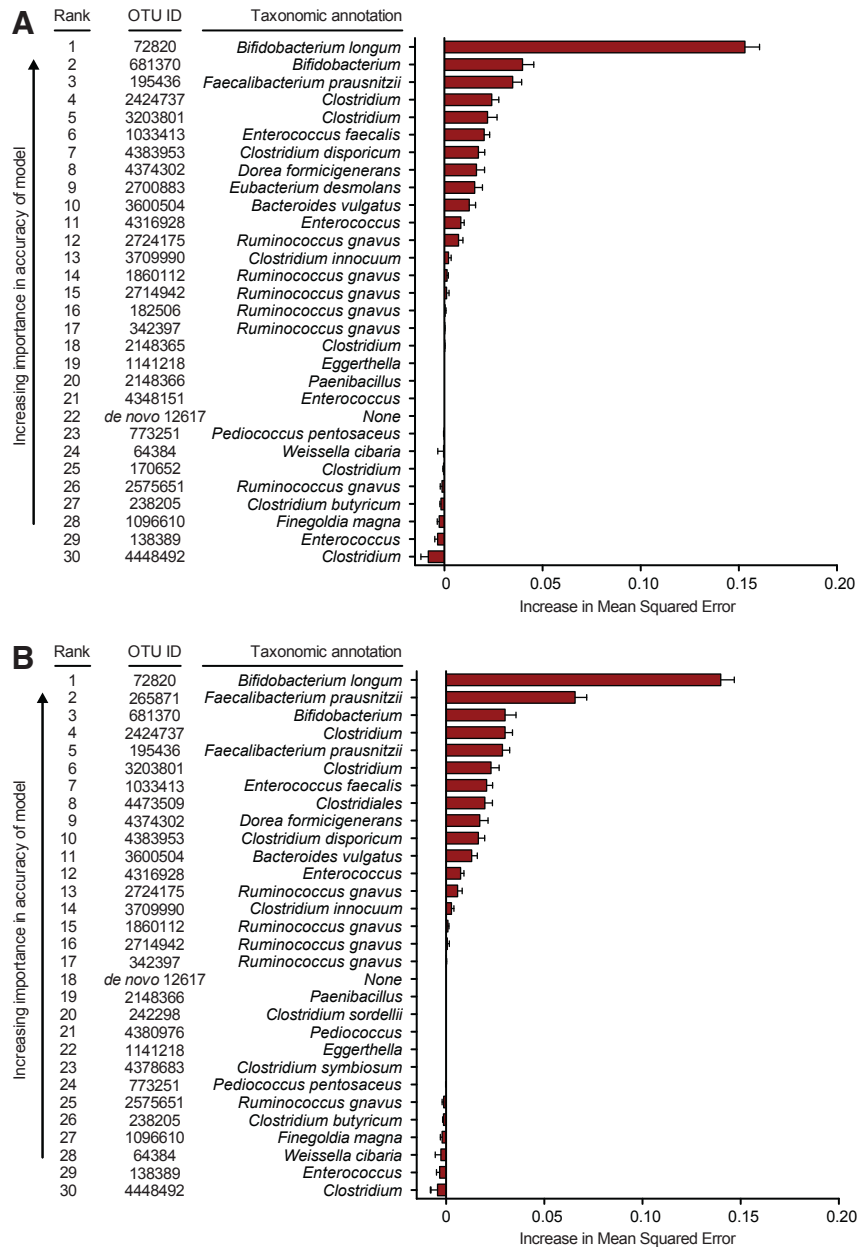

**Feature importance scores for OTUs, identified as weight gain and lean body mass gain discriminatory in mice, applied to members of the Malawian twin birth cohort. (A)** The 30 most weight gain discriminatory OTUs (as shown in Fig. 2D), and **(B)** the 30 most lean body mass gain discriminatory OTUs (as shown in Fig. S2), ranked by increase in mean squared error (MSE) when these taxa are regressed against the WHZ scores of infants and children in the healthy Malawian cohort. Bars show mean±SD of the MSE.

## Supplementary Data Tables

### Table S1.

**Summary of the ages, anthropometry, and time of fecal collection from Malawian cohorts. (A)** Concordant healthy Malawian twins pairs/triplet sets. **(B)** Members of the iLiNS-DYAD-M birth cohort with fewer than 3 reported days of antibiotic consumption.

**Table S2.**  
**Summary of bacterial V4-16S rRNA datasets from human donors. (A)** Malawi  
Twin cohort. **(B)** iLiNS-DYAD-M cohort.

**Table S3.**  
**Random Forests-derived sparse model of microbiota maturation in healthy Malawian infants/children. (A)** Rank order of OTU feature importance. **(B)** Comparison of OTUs comprising the sparse Malawian and sparse Bangladeshi models.

**Table S4.**

**V4-16S rRNA-based characterization of fecal microbiota sampled from transplant recipients. (A)** Maturity indices (microbiota age and MAZ scores) for microbiota selected for transplantation into gnotobiotic mice. **(B)** Summary of 16S rRNA datasets generated from the fecal microbiota of recipient mice in the initial screen of 19 donor microbiota. **(C)** Summary of 16S rRNA datasets generated from the follow-up transplant studies using microbiota from a 6-month-old healthy and a 6-month-old severely stunted/underweight donor.

**Table S5.**

**Composition of the Malawi-8 (M8) diet. (A) Summary of ingredients. (B) Nutritional analysis.**



**Table S6.**

**Summary of growth phenotypes in recipients of the 19 microbiota from 6- and 18-month-old healthy and undernourished Malawian donors. (A) Weight gain. (B)**

Lean body mass gain and fat body mass gain. Spearman's rank correlation of Shannon Index to lean body mass gain at day 28 following gavage of the donors' microbiota is non-significant ( $P = 0.3275$ ).

**Table S7.**  
**Consumption of M8 chow in each donor group of gnotobiotic recipient mice**  
**from the screen of 19 donor microbiota.**

**Table S8.**

**Rank order list of feature importance scores of OTUs in Random Forest models based on the growth phenotypes of gnotobiotic mice with 19 different transplanted microbiota from 6- and 18-month-old Malawian donors. (A) Weight gain. (B) Lean body mass gain.**

**Table S9.**

**Spearman's rank correlations of OTUs to mouse weight and lean body mass gain as well as to the chronological ages of members of concordant healthy Malawian twin pairs/triplet sets and the of iLiNS-DYAD-M cohort. (A) Weight gain. (B) Lean body mass gain.**

**Table S10.**

**Rank order list of OTU feature importance scores in Random Forest models based on the femoral bone metrics of groups of recipient mice with 19 different transplanted microbiota from 6- and 18-month-old Malawian donors.**

**Table S11.**  
**List of species and their relative abundances used to construct the**  
**bargraphs shown in Fig. S4B.**

**Table S12.**  
**Direction and success of invasion in cohousing experiments involving H<sup>CH</sup> and Un<sup>CH</sup> mice.**

**Table S13.**

**Reconstructed metabolic pathways for *Ruminococcus gnavus* TS8243C and *Clostridium symbiosum* TS8243C.** **(A)** Overall number of genes in the reconstructed metabolic pathways of the two strains. The three major functional categories of studied genes are those involved in (i) carbohydrate and central carbon metabolism, (ii) amino acid metabolism and (iii) vitamin and cofactor biosynthesis. **(B,C)** Detailed lists of genes in *R. gnavus* TS8243C and *C. symbiosum* TS8243C, and their orthologs in the type strains, *R. gnavus* ATCC 29149 and *C. symbiosum* WAL-14163. Enzymes are identified by their enzyme commission (EC) numbers. Functional descriptions for carbohydrate active enzymes (CAZymes) include their assigned glycoside hydrolase (GH) families and their predicted localization (intracellular versus secreted as defined by SignalP). Transcriptional regulators and riboswitches that are predicted to control expression of individual genes from the reconstructed pathways (according to conservative propagation in the RegPrecise database) are listed in the last column. Central carbon metabolism genes controlled by the global redox-responsive regulator Rex are also indicated. Genes with novel predicted functions are marked with an asterisk. **(D)** Summarized metabolic capabilities. Predicted ability (+) or inability (-) to: (i) synthesize amino acids, (ii) synthesize B-vitamin related cofactors, (iii) utilize sugars, (iv) utilize other sources of carbon and energy, and (v) generate fermentation products.



**Table S14.**  
**List of taxa and their relative abundances (%) used to construct the bargraphs shown in Fig. 4C.**

**Table S15.**

**Metabolic phenotypes, as defined by targeted mass spectrometry, of gnotobiotic mice colonized with microbiota from the severely stunted/underweight infant donor or with the donor's microbiota together with *R. gnavus* TS8243C and *C. symbiosum* TS8243C.**

**Table S16.**

**Metabolic phenotypes of gnotobiotic mice colonized with a normally mature microbiota from a 6-month-old healthy (H) infant and a significantly immature microbiota from a 6-month-old severely stunted/underweight (Un) donor.**

**Table S17.**

**Spearman's rank correlations between levels of metabolites and the abundances of bacterial species in the fecal microbiota of mice colonized with the healthy versus the severely stunted/underweight infant microbiota. (A) Serum acylcarnitines. (B) Amino acids in liver and gastrocnemius muscle. (C) Organic acids assayed in liver and gastrocnemius muscle.**
